Title: COMPARATIVE PHARMACODYNAMICS OF MIDAZOLAM AND DIAZEPAM

Authors: M. Bühner, M.D., P.O. Maitre, M.D., C. Crevoisier, Ph.D., O. Hung, M.D.,  
D.R. Stanski, M.D.

Affiliation: Departments of Anesthesiology, Stanford University and Veterans Administration  
Medical Center, Palo Alto, California and Hoffmann - La Roche Ltd, Basel,  
Switzerland

**Introduction:** The CNS effect of a benzodiazepine given in hypnotic doses (unconsciousness) can be quantitated by electroencephalography (EEG)<sup>1</sup>. The goal of the present study was to demonstrate the relationship between CNS drug effect and plasma concentrations for the benzodiazepines midazolam (M) and diazepam (D).

**Methods:** Following institutional approval and informed consent 4 healthy volunteers (36 - 40 yr, 70 - 83 kg) were studied on 17 different occasions. M was administered in 3 subjects at 2 or 3 doses (7.5, 15 and 25 mg, infusion rate of 5 mg/min); D was administered in 3 subjects at 3 doses (15, 30 and 50 mg, infusion rate of 10 mg/min). In 2 subjects only M or D was investigated. Fronto-occipital EEG leads were used. After recording 5 min of baseline EEG, either drug was infused iv and EEG recorded for 2-3 hr. Ventilation was assisted with a face mask when needed. Aperiodic analysis<sup>2</sup> of EEG signals was performed with Lifescan EEG monitor (Neurometrics). EEG total voltage (frequency range: 0.5 - 30 Hz) was used as the descriptor of EEG drug effect. Arterial blood was sampled every min during the first 5 - 10 min and at increasing intervals during the following 2 - 3 hr. Plasma drug concentrations (Cp) were measured by gas chromatography with electron capture detection. A time lag between Cp and EEG effect was present in the data and could be quantitated by an effect compartment model. Equilibration half-life (T<sub>1/2</sub> keo) between Cp and apparent concentration at effect site (Ce) was determined by using a nonparametric method<sup>3</sup>. Ce is proportional to Cp at steady state. This method generates the Ce-effect relationship directly from Cp vs time and effect vs time curves. The generated Ce-effect data (figure) were fitted to the sigmoid Emax model

$$\text{effect} = \text{predrug effect} + (\text{Emax} * \text{Ce}^N / \text{EC50}^N + \text{Ce}^N)$$

where Emax = maximal effect, EC50 = Ce producing 50% of Emax, N = exponent (steepness of curve).

**Results:** The equilibration (T<sub>1/2</sub> keo) of drug concentrations in plasma and effect site for M is 3 times slower than for D (table). Predrug effect and maximal drug effect are the same in both drugs. The average EC50 (measure of drug potency at steady state Cp and of individual brain sensitivity) is 5 times higher for M vs D. The variability in brain sensitivity is greater between than within individuals. For each subject the EC50 are consistent with repeated doses (table, figure).

**Discussion:** Using EEG as a drug effect measure we found clinically important differences in pharmacodynamics of M and D. Because of the difference in T<sub>1/2</sub> keo, maximal drug effect occurs later with M relative to D. This suggests that the clinician should wait a longer period of time before redosing M compared to D. Furthermore, M appears to be at least 5 times more potent than D.

Figure : Effect-Ce relationship for three doses of midazolam and three doses of diazepam in subject C

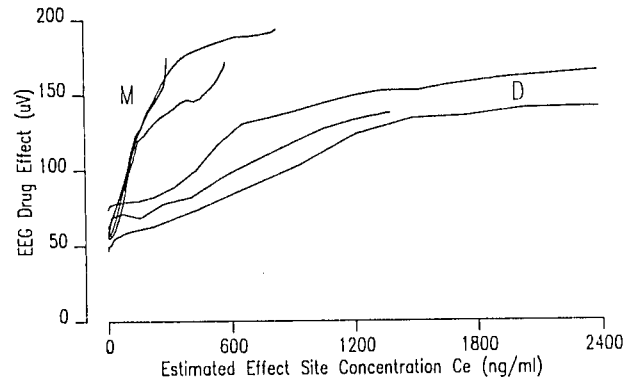

Table

| Sub-ject        | Drug | Dose (mg) | T <sub>1/2</sub> keo (min) | Eo (uV) | Emax (uV) | EC50 (ng/ml) | N    |
|-----------------|------|-----------|----------------------------|---------|-----------|--------------|------|
| A               | M    | 7.5       | 4.10                       | 21      | 128*      | 94           | 1.80 |
| A               | M    | 15        | 5.53                       | 28      | 138       | 109          | 2.20 |
| A               | M    | 25        | 4.90                       | 21      | 128       | 125          | 2.14 |
| B               | M    | 7.5       | -                          | 49      | 138*      | 385          | 1.02 |
| B               | M    | 15        | 5.72                       | 47      | 138       | 329          | 1.17 |
| C               | M    | 7.5       | 5.59                       | 60      | 133*      | 151          | 2.00 |
| C               | M    | 15        | 6.78                       | 55      | 122       | 165          | 1.57 |
| C               | M    | 25        | 5.29                       | 64      | 133       | 164          | 1.74 |
| Midazolam mean: |      |           | 5.42                       | 43      | 132       | 190          | 1.71 |
| A               | D    | 15        | 1.77                       | 22      | 174*      | 1256         | 1.06 |
| A               | D    | 30        | 2.40                       | 21      | 267       | 1090         | 1.30 |
| A               | D    | 50        | 1.79                       | 19      | 174       | 907          | 1.87 |
| C               | D    | 15        | 1.20                       | 56      | 115*      | 781          | 1.66 |
| C               | D    | 30        | 2.26                       | 74      | 87        | 607          | 3.20 |
| C               | D    | 50        | 1.21                       | 47      | 115       | 871          | 1.65 |
| D               | D    | 15        | 0.99                       | 42      | 94*       | 1151         | 0.99 |
| D               | D    | 30        | 1.87                       | 27      | 83        | 819          | 1.42 |
| D               | D    | 50        | 1.22                       | 40      | 94        | 1138         | 1.43 |
| Diazepam mean:  |      |           | 1.63                       | 39      | 134       | 958          | 1.62 |

\* duration of peak effect too short to provide sufficient points for Emax estimation by nonlinear regression. Emax was constrained to the value estimated for the high dose experiment.

References:

1. Anesthesiology 67(suppl): A658, 1987
2. J Clin Monit 2: 190-197, 1986
3. Clin Pharmacol Ther 40:86-93, 1986
